# Supplementary material for: Molecular evolution of mammalian genes with epistatic interactions in fertilization
Source: BMC Evol Biol. 2019 Jul 25;19:154. doi: 10.1186/s12862-019-1480-6 (PMC6659299; doi:10.1186/s12862-019-1480-6)
Supplement: Supplementary file 3 — Appendix S3. Summary of species names, accession numbers, and Newick strings used in codon model analyses (XLSX 51 kb) [file 12862_2019_1480_MOESM3_ESM.xlsx]

## Sheet: species, gene matrix, Newick
Ensembl genomes		Zp3r	C4bpa	C4bpb	Zp1	Zp4	Zp2	Zp3	Izumo1	Juno		Ensembl genomes		C4BPA	C4BPB	ZP1	ZP4	ZP2	ZP3	IZUMO1	JUNO
>pika	Ochotona princeps	XM_004578928.2	ENSOPRG00000011485		XM_004585462.1	ENSOPRG00000005867	ENSOPRP00000010520	XM_004586981.2	ENSOPRG00000015163	ENSOPRG00000004158		>human	Homo sapiens	NM_000715.3	NM_000716.3	NM_207341.3	NM_021186.4	NM_003460.2	NM_001110354.1	NM_182575.2	NM_001199206.1
>rabbit	Oryctolagus cuniculus	XM_017347608.1	XM_008268483.2		ENSOCUG00000015673	ENSOCUG00000002467	ENSOCUP00000011114	ENSOCUG00000015762	ENSOCUG00000024222	ENSOCUG00000013431		>Angola_colobus	Colobus angolensis	ENSCANG00000033101	ENSCANG00000027599	ENSCANG00000042768	ENSCANG00000029452	ENSCANP00000031830	XM_011930123.1, XM_011930800.1	ENSCANG00000030567	ENSCANG00000036658
>kangaroo_rat	Dipodomys ordii	XM_013017338.1	XM_013017339.1	XM_013017374.1	ENSDORG00000006902	XM_013009226.1		ENSDORG00000004823	XM_013027860.1	ENSDORG00000005007		>black_snub-nosed_monkey	Rhinopithecus bieti	ENSRBIG00000037062	ENSRBIG00000036152	ENSRBIT00000052477	ENSRBIG00000042352	ENSRBIP00000020506	XM_017857636.1	ENSRBIG00000036773	ENSRBIG00000034661
>lesser_Egyptian_jerboa	Jaculus jaculus	ENSJJAG00000021444	ENSJJAG00000020143	XM_004663452.1	ENSJJAG00000021856		ENSJJAP00000014926		ENSJJAG00000015096	ENSJJAG00000018637		>Bolivian_squirrel_monkey	Saimiri boliviensis	ENSSBOG00000030104	ENSSBOG00000021724	ENSSBOG00000018306	ENSSBOG00000028231	ENSSBOP00000039763	XM_010344841.1	ENSSBOG00000023018	ENSSBOG00000021841
>house_mouse	Mus musculus	NM_009581	NM_007576.3		NM_009580.2		ENSMUSP00000033207	NM_011776.1	NM_001018013.1	NM_022888.2		>bonobo	Pan paniscus	ENSPPAG00000040051	ENSPPAG00000034105	ENSPPAG00000035599	ENSPPAG00000030466	ENSPPAP00000028784	ENSPPAG00000041144	ENSPPAG00000028632	ENSPPAG00000041423
>Ryukyu_mouse	Mus caroli	MGP_CAROLIEiJ_G0014553	MGP_CAROLIEiJ_G0014554	XM_021164544.1	MGP_CAROLIEiJ_G0022705	XM_021180912.1	MGP_CAROLIEiJ_P0081864		MGP_CAROLIEiJ_G0029731	MGP_CAROLIEiJ_G0031790		>bushbaby	Otolemur garnettii	ENSOGAG00000004104	XM_003792317.3		ENSOGAG00000016179	ENSOGAP00000009984	XM_003794181.1	ENSOGAG00000003577	ENSOGAG00000002522
>shrew_mouse	Mus pahari	MGP_PahariEiJ_G0027788		XM_021198561.1	MGP_PahariEiJ_G0014199	XM_021216093.1	MGP_PahariEiJ_P0018658	MGP_PahariEiJ_G0024429	MGP_PahariEiJ_G0012956	MGP_PahariEiJ_G0014666		>capuchin	Cebus capucinus	ENSCCAG00000015233	ENSCCAG00000030739	XM_017530775.1	ENSCCAG00000037192	ENSCCAP00000040555	XM_017533490.1	ENSCCAG00000031630	ENSCCAG00000021617
>rat	Rattus norvegicus	ENSRNOG00000025862	ENSRNOG00000004062	NM_016995.2	ENSRNOG00000020907	ENSRNOG00000027506	ENSRNOP00000072132	ENSRNOG00000001434	ENSRNOG00000024678	ENSRNOG00000019894		>chimpanzee	Pan troglodytes	ENSPTRG00000001927	ENSPTRG00000001926	ENSPTRG00000003723	ENSPTRG00000002151	ENSPTRP00000013407	XM_016945824.1	ENSPTRG00000011255	ENSPTRG00000004182
>deer_mouse	Peromyscus maniculatus	ENSPEMG00000017253	XM_015989104.1	XM_006995654.2	ENSPEMG00000016480	ENSPEMG00000023885	ENSPEMP00000014891	ENSPEMG00000015104	ENSPEMG00000012431	ENSPEMG00000021678		>Coquerel's_sifaka	Propithecus coquereli	ENSPCOG00000026595	ENSPCOG00000025523		ENSPCOG00000024830	ENSPCOP00000011570	XM_012640233.1	ENSPCOG00000018755	ENSPCOG00000020918
>Chinese_hamster	Cricetulus griseus	ENSCGRG00000007081	ENSCGRG00000006766	XM_016967299.1	ENSCGRG00000008356	ENSCGRG00001021090	ENSCGRP00001014275	ENSCGRG00001021528	ENSCGRG00001023125	ENSCGRG00000018268		>crab-eating_macaque	Macaca fascicularis	ENSMFAG00000004655	ENSMFAG00000002712	ENSMFAT00000014211	ENSMFAG00000000954	ENSMFAP00000036480	XM_015447204.1	ENSMFAG00000016667	ENSMFAG00000030684
>golden_hamster	Mesocricetus auratus	XM_005079895.2	XM_005079894.3	XM_021232891.1	ENSMAUG00000011401	ENSMAUG00000006040	ENSMAUP00000012703	ENSMAUG00000020716	ENSMAUG00000012451	ENSMAUG00000018564		>drill	Mandrillus leucophaeus	ENSMLEG00000030847	ENSMLEG00000040827	ENSMLEG00000006157	ENSMLEG00000015046	ENSMLEP00000033950	XM_011976349.1	ENSMLEG00000043167	ENSMLEG00000033707
>prairie_vole	Microtus ochrogaster	XM_013346717.1	ENSMOCG00000002177	XM_005348308.2	ENSMOCG00000008625	ENSMOCG00000012692	ENSMOCP00000002367	ENSMOCG00000018626	ENSMOCG00000010279	ENSMOCG00000012181		>gibbon	Nomascus leucogenys	ENSNLEG00000000986	ENSNLEG00000007499	ENSNLEG00000013607	ENSNLEG00000035233	ENSNLEP00000012836	XM_012496223.1	ENSNLEG00000004623	ENSNLEG00000007108
>blind_mole_rat	Nannospalax galili		XM_008823347.1, XM_008838131.1	XM_008823348.1	ENSNGAG00000003575	XM_008841355.1	ENSNGAP00000024246	ENSNGAG00000003124	ENSNGAG00000020124	ENSNGAG00000009610		>golden_snub-nosed_monkey	Rhinopithecus roxellana	ENSRROG00000037028	ENSRROG00000033566	ENSRROG00000039142	ENSRROG00000027026	ENSRROP00000008323	XM_010387431.1	ENSRROG00000010904	ENSRROG00000015988
>naked_mole_rat	Heterocephalus glaber	XM_013076029.2	XM_021242296.1	ENSHGLG00000004277		ENSHGLG00000015875	ENSHGLP00000013986	ENSHGLG00000013732	ENSHGLG00000008799	ENSHGLG00000008985		>gorilla	Gorilla gorilla	ENSGGOG00000012258	ENSGGOG00000012249	ENSGGOG00000013678	ENSGGOG00000011614	ENSGGOP00000000081	ENSGGOG00000005450	ENSGGOG00000001242	ENSGGOG00000014840
>Damara_mole_rat	Fukomys damarensis		XM_019205853.1	XM_010613219.2		ENSFDAG00000008664	ENSFDAP00000006091	ENSFDAG00000008489	XM_019210086.1	ENSFDAG00000007566		>Ma's_night_monkey	Aotus nancymaae	ENSANAG00000023699	ENSANAG00000020439	ENSANAG00000025693	ENSANAG00000034287	ENSANAP00000033370	XM_012449020.1	ENSANAG00000027491	ENSANAG00000030382
>guinea_pig	Cavia porcellus	ENSCPOG00000006274	ENSCPOG00000004303	ENSCPOG00000000380		XM_023566516.1	ENSFDAP00000006091	ENSCPOG00000022445	XM_003465439.4	ENSCPOG00000011657		>macaque	Macaca mulatta	ENSMMUG00000013738	ENSMMUG00000022168	ENSMMUG00000000022	ENSMMUG00000002105	ENSMMUP00000053514	XM_002803236.2	ENSMMUG00000004019	ENSMMUG00000040247
>degu	Octodon degus	ENSODEG00000009601	XM_023701219	XM_004641196.2		XM_023700885.1	ENSODEP00000014940	ENSODEG00000016251	XM_004646521.2	ENSODEG00000000695		>marmoset	Callithrix jacchus	ENSCJAG00000018336	ENSCJAG00000018353	XM_017978476.1	ENSCJAG00000017477	ENSCJAP00000016971	XM_008981923.1	ENSCJAG00000000311	ENSCJAG00000003960
>long-tailed_chinchilla	Chinchilla lanigera	XM_013502882.1	XM_013502874.1	XM_005375411.2		XM_005405012.1	ENSCLAP00000012549	ENSCLAG00000015451	XM_013508990.1	ENSCLAG00000015110		>mouse_lemur	Microcebus murinus	ENSMICG00000008435	ENSMICG00000046708		ENSMICG00000016091	ENSMICP00000013748	XM_012759494.2	ENSMICG00000013241	ENSMICG00000031112
>squirrel	Ictidomys tridecemlineatus	XM_021729253.1	ENSSTOG00000006619	XM_005329471.3	ENSSTOG00000027607	XM_005320346.1	ENSSTOP00000006464	XM_005328592.1	ENSSTOG00000033209	ENSSTOG00000032389		>olive_baboon	Papio anubis	ENSPANG00000017949	ENSPANG00000018149	ENSPANG00000024909	ENSPANG00000019709	ENSPANP00000012349	XM_017956628.2	ENSPANG00000012939	ENSPANG00000034439
												>orangutan	Pongo abelii	ENSPPYG00000000270	ENSPPYG00000000271	ENSPPYG00000003203	ENSPPYG00000000078	ENSPPYP00000008105	XM_009242680.1, XM_002817816.2	XM_002829518.1	ENSPPYG00000003780
other Glires genomes												>pig-tailed_macaque	Macaca nemestrina	ENSMNEG00000034491	ENSMNEG00000015766	ENSMNEG00000042567	ENSMNEG00000029377	ENSMNEP00000040581	XM_011760030.1	ENSMNEG00000033280	ENSMNEG00000030482
>beaver	Castor canadensis	XM_020153096.1	XM_020170234.1	XM_020170197.1	XM_020176187.1	XM_020157461.1		XM_020156420.1	XM_020158041.1	XM_020183399.1		>sooty_mangabey	Cercocebus atys	ENSCATG00000022172	ENSCATG00000043219	ENSCATG00000034202	ENSCATG00000025480	ENSCATP00000034435	XM_012076485.1	ENSCATG00000037416
>Mongolian_gerbil	Meriones unguiculatus	XM_021640130.1	XM_021640127.1	XM_021640113.1	XM_021636080.1	XM_021663194.1	XM_021635689.1	XM_021649319.1	XM_021640395.1	XM_021635172.1		>tarsier	Carlito syrichta	ENSTSYG00000014490	ENSTSYG00000014489	ENSTSYG00000001756	ENSTSYG00000000325	ENSTSYP00000012850	XM_008073946.1	XM_021708044.1
>marmot	Marmota marmota	XM_015483341.1	XM_015483724.1	XM_015483726.1	XM_015506786.1	XM_015504378.1	XM_015491569.1	XM_015490691.1	XM_015496973.1	XM_015490066.1		>vervet	Chlorocebus sabaeus	ENSCSAG00000015107	ENSCSAG00000015078	ENSCSAG00000006244	ENSCSAG00000009624	ENSCSAP00000003626	XM_008018406.1	ENSCSAG00000002813	ENSCSAG00000003400
												other Primates genomes
												>red_colobus	Piliocolobus tephrosceles	XM_023186889.1	XM_023187046.1	XM_023215489.1	XM_023216086.1	XM_023225037.1	XM_023218615.1	XM_023182695.1	XM_023225633.1
												Use the Springer et al. 2012 phylogeny for Primates		((bushbaby,(mouse_lemur,Coquerels_sifaka)),(tarsier,(((Bolivian_squirrel_monkey,capuchin),(Mas_night_monkey,marmoset)),(((((human,(chimpanzee,bonobo)),gorilla),orangutan),gibbon),(((((sooty_mangabey,drill),olive_baboon),((macaque,crab-eating_macaque),pig-tailed_macaque)),vervet),((red_colobus,Angola_colobus),(black_snub-nosed_monkey,golden_snub-nosed_monkey)))))));
															((bushbaby,(mouse_lemur,Coquerels_sifaka)),(tarsier,(((Bolivian_squirrel_monkey,capuchin),(Mas_night_monkey,marmoset)),(((((human,(chimpanzee,bonobo)),gorilla),orangutan),gibbon),(((((sooty_mangabey,drill),olive_baboon),((macaque,crab-eating_macaque),pig-tailed_macaque)),vervet),((red_colobus,Angola_colobus),(black_snub-nosed_monkey,golden_snub-nosed_monkey)))))));
																((tarsier,((Bolivian_squirrel_monkey,capuchin),(Mas_night_monkey),(((((human,(chimpanzee,bonobo)),gorilla),orangutan),gibbon),(((((sooty_mangabey,drill),olive_baboon),((macaque,crab-eating_macaque),pig-tailed_macaque)),vervet),((red_colobus,Angola_colobus),(black_snub-nosed_monkey,golden_snub-nosed_monkey)))))));
																	((bushbaby,(mouse_lemur,Coquerels_sifaka)),(tarsier,(((Bolivian_squirrel_monkey,capuchin),(Mas_night_monkey,marmoset)),(((((human,(chimpanzee,bonobo)),gorilla),orangutan),gibbon),(((((sooty_mangabey,drill),olive_baboon),((macaque,crab-eating_macaque),pig-tailed_macaque)),vervet),((red_colobus,Angola_colobus),(black_snub-nosed_monkey,golden_snub-nosed_monkey)))))));
																		((bushbaby,(mouse_lemur,Coquerels_sifaka)),(tarsier,(((Bolivian_squirrel_monkey,capuchin),(Mas_night_monkey,marmoset)),(((((human,(chimpanzee,bonobo)),gorilla),orangutan),gibbon),(((((sooty_mangabey,drill),olive_baboon),((macaque,crab-eating_macaque),pig-tailed_macaque)),vervet),((red_colobus,Angola_colobus),(black_snub-nosed_monkey,golden_snub-nosed_monkey)))))));
																			((bushbaby,(mouse_lemur,Coquerels_sifaka)),(tarsier,(((Bolivian_squirrel_monkey,capuchin),(Mas_night_monkey,marmoset)),(((((human,(chimpanzee,bonobo)),gorilla),orangutan),gibbon),(((((sooty_mangabey,drill),olive_baboon),((macaque,crab-eating_macaque),pig-tailed_macaque)),vervet),((red_colobus,Angola_colobus),(black_snub-nosed_monkey,golden_snub-nosed_monkey)))))));
																				((bushbaby,(mouse_lemur,Coquerels_sifaka)),(tarsier,(((Bolivian_squirrel_monkey,capuchin),(Mas_night_monkey,marmoset)),(((((human,(chimpanzee,bonobo)),gorilla),orangutan),gibbon),(((((sooty_mangabey,drill),olive_baboon),((macaque,crab-eating_macaque),pig-tailed_macaque)),vervet),((red_colobus,Angola_colobus),(black_snub-nosed_monkey,golden_snub-nosed_monkey)))))));
																					((bushbaby,(mouse_lemur,Coquerels_sifaka)),(((Bolivian_squirrel_monkey,capuchin),(Mas_night_monkey,marmoset)),(((((human,(chimpanzee,bonobo)),gorilla),orangutan),gibbon),((((drill,olive_baboon),((macaque,crab-eating_macaque),pig-tailed_macaque)),vervet),((red_colobus,Angola_colobus),(black_snub-nosed_monkey,golden_snub-nosed_monkey))))));
Use the Fabre et al. 2012 phylogeny for Glires		((pika,rabbit),((squirrel,marmot),((((degu,long-tailed_chinchilla),guinea_pig),naked_mole_rat),((beaver,kangaroo_rat),(lesser_Egyptian_jerboa,(((((house_mouse,Ryukyu_mouse),shrew_mouse),rat),Mongolian_gerbil),(((Chinese_hamster,golden_hamster),prairie_vole),deer_mouse)))))));
			((pika,rabbit),((squirrel,marmot),((((degu,long-tailed_chinchilla),guinea_pig),(naked_mole_rat,Damara_mole_rat)),((beaver,kangaroo_rat),(lesser_Egyptian_jerboa,(blind_mole_rat,((((house_mouse,Ryukyu_mouse),rat),Mongolian_gerbil),(((Chinese_hamster,golden_hamster),prairie_vole),deer_mouse))))))));
				((squirrel,marmot),((((degu,long-tailed_chinchilla),guinea_pig),(naked_mole_rat,Damara_mole_rat)),((beaver,kangaroo_rat),(lesser_Egyptian_jerboa,(blind_mole_rat,((((Ryukyu_mouse,shrew_mouse),rat),Mongolian_gerbil),(((Chinese_hamster,golden_hamster),prairie_vole),deer_mouse)))))));
					((pika,rabbit),((squirrel,marmot),((beaver,kangaroo_rat),(lesser_Egyptian_jerboa,(blind_mole_rat,(((((house_mouse,Ryukyu_mouse),shrew_mouse),rat),Mongolian_gerbil),(((Chinese_hamster,golden_hamster),prairie_vole),deer_mouse)))))));
						((pika,rabbit),((squirrel,marmot),((((degu,long-tailed_chinchilla),guinea_pig),(naked_mole_rat,Damara_mole_rat)),((beaver,kangaroo_rat),(blind_mole_rat,((((Ryukyu_mouse,shrew_mouse),rat),Mongolian_gerbil),(((Chinese_hamster,golden_hamster),prairie_vole),deer_mouse)))))));
							((pika,rabbit),((squirrel,marmot),((((degu,long-tailed_chinchilla),guinea_pig),(naked_mole_rat,Damara_mole_rat)),(lesser_Egyptian_jerboa,(blind_mole_rat,(((((house_mouse,Ryukyu_mouse),shrew_mouse),rat),Mongolian_gerbil),(((Chinese_hamster,golden_hamster),prairie_vole),deer_mouse)))))));
								((pika,rabbit),((squirrel,marmot),((((degu,long-tailed_chinchilla),guinea_pig),(naked_mole_rat,Damara_mole_rat)),((beaver,kangaroo_rat),(blind_mole_rat,((((house_mouse,shrew_mouse),rat),Mongolian_gerbil),(((Chinese_hamster,golden_hamster),prairie_vole),deer_mouse)))))));
									((pika,rabbit),((squirrel,marmot),((((degu,long-tailed_chinchilla),guinea_pig),(naked_mole_rat,Damara_mole_rat)),((beaver,kangaroo_rat),(lesser_Egyptian_jerboa,(blind_mole_rat,(((((house_mouse,Ryukyu_mouse),shrew_mouse),rat),Mongolian_gerbil),(((Chinese_hamster,golden_hamster),prairie_vole),deer_mouse))))))));
										((pika,rabbit),((squirrel,marmot),((((degu,long-tailed_chinchilla),guinea_pig),(naked_mole_rat,Damara_mole_rat)),((beaver,kangaroo_rat),(lesser_Egyptian_jerboa,(blind_mole_rat,(((((house_mouse,Ryukyu_mouse),shrew_mouse),rat),Mongolian_gerbil),(((Chinese_hamster,golden_hamster),prairie_vole),deer_mouse))))))));
